# Supplementary material for: Factors Contributing to Chronic Kidney Disease following COVID-19 Diagnosis in Pre-Vaccinated Hospitalized Patients
Source: MDPI journal article supplement (doi:10.3390/vaccines11020433), 2023-02-13
Supplement: s1 [file s1]

**Table S1:** Prevalence and Percentage Antiviral and Antibiotic Used.

| No | Antiviral                                                                                                                                          | n (%)     | Antibiotic                                            | n (%)        |
|----|----------------------------------------------------------------------------------------------------------------------------------------------------|-----------|-------------------------------------------------------|--------------|
| 1  | Isoprinosinee (3 x 500 mg)                                                                                                                         | 5 (1.3)   | Levofloxacin (1 x 750 mg)                             | 66<br>(17.5) |
| 2  | Favipiravir (day 1: 2 x1600 mg<br>days 2-4: 2 x 600 mg)                                                                                            | 74 (19.6) | Meropenem (3 x 1 g)                                   | 3 (0.8)      |
| 3  | Remdesivir (1 x 200 mg)                                                                                                                            | 31 (8.2)  | Ceftriaxone (1 x 2 g)                                 | 13 (3.4)     |
| 4  | Isoprinosine (3 x 500 mg)<br>+ remdesivir (1 x 200 mg)                                                                                             | 25 (6.6)  | Azitromycin(1 x 500 mg)                               | 43<br>(11.4) |
| 5  | Isoprinosine (3 x 500 mg)<br>+ favipiravir (day 1: 2 x1600 mg;<br>days 2-4: 2 x 600 mg) inver                                                      | 29 (7.7)  | Levofloxacin (1 x 750 mg) +<br>Meropenem (3 x 1 g)    | 17 (4.5)     |
| 6  | Isoprinosine (3 x 500 mg)<br>+ remdesivir (1 x 200 mg)<br>+ favipiravir (day 1: 2 x 1600 mg;<br>days 2-4: 2 x 600 mg)                              | 21 (5.6)  | Levofloxacin (1 x 750 mg) +<br>Ceftriaxone (1 x 2 g)  | 37 (9.8)     |
| 7  | Isoprinosine (3 x 500 mg)<br>+ favipiravir (day 1: 2 x 1600 mg;<br>days 2-4: 2 x 600 mg)<br>+ remdesivir (1 x 200 mg)<br>+ oseltamivir (2 x 75 mg) | 3 (0.8)   | Meropenem (3 x 1 g)<br>+ Azitromycin (1 x 500 mg)     | 2 (0.5)      |
| 8  | Favipiravir (day 1: 2 x 1600 mg;<br>days 2-4 2 x 600 mg) + remdesivir<br>(1 x 200 mg)                                                              | 33 (8.7)  | Azitromycin (1 x 500 mg)<br>+ Ceftriaxone (1 x 2 g)   | 11 (2.9)     |
| 9  | Isoprinosine (3 x 500 mg)<br>+ remdesivir (1 x 200 mg)<br>+ favipiravir (day 1: 2 x1600 mg;<br>days 2-4: 2 x 600 mg)                               | 1 (0.3)   | Fosfomycin (2 x 1 g) + Ceftazdim                      | 1 (0.3)      |
| 10 | Isoprinosine (3 x 500 mg) +<br>oseltamivir (2 x 75 mg)<br>+ Ivermectin (1 x 24 mg)                                                                 | 1 (0.3)   | Cotrimoxazole (1 x 960 mg)<br>+ Ceftriaxone (1 x 2 g) | 2 (0.5)      |

|    |                                                                                                                                                   |           |                                                                                                                                |          |
|----|---------------------------------------------------------------------------------------------------------------------------------------------------|-----------|--------------------------------------------------------------------------------------------------------------------------------|----------|
| 11 | No antiviral agent                                                                                                                                | 57 (15.1) | Azitromycin (1 x 500 mg)<br>+ Meropenem (3 x 1 g)<br>+ Ceftriaxone (1 x 2 g)                                                   | 2 (0.5)  |
| 12 | Isoprinosine (3 x 500 mg)+<br>Remdesivir (1 x 200 mg)<br>+ Methisoprinol (3 x 500 mg)                                                             | 1 (0.3)   | Levofloxacin (1 x 750 mg) +<br>Ceftriaxone (1 x 2 g) + Meropenem (3<br>x 1 g)                                                  | 5 (1.3)  |
| 13 | Oseltamivir (2 x 75 mg)<br>+ Favipiravir (day 1: 2 x1600 mg;<br>days 2-4 2 x 600 mg)<br>+ Remdesivir (1 x 200 mg)                                 | 18 (4.8)  | Azitromycin (1 x 500 mg)<br>+ Meropenem (3 x 1 g)<br>+ Levofloxacin (1 x 750 mg)                                               | 14 (3.7) |
| 14 | Isoprinosine (3 x 500 mg) +<br>Favipiravir (day 1: 2 x1600 mg;<br>days 2-4: 2 x 600 mg)<br><br>+ Oseltamivir (2 x 75 mg)                          | 2 (0.5)   | Azitromycin (1 x 500 mg)<br>+ Cefotaxime (3 x 1 g) + Meropenem<br>(3 x 1 g)                                                    | 2 (0.5)  |
| 15 | Ivermectin + Remdesivir (1 x 200<br>mg)                                                                                                           | 1 (0.3)   | Levofloxacin (1 x 750 mg) +<br>Ceftriaxone + Meropenem (3 x 1 g)<br>+ Amikacin (2 x 500 mg)                                    | 1 (0.3)  |
| 16 | Isoprinosine (3 x 500 mg) +<br>Remdesivir (1 x 200 mg) +<br>Oseltamivir (2 x 75 mg)                                                               | 3 (0.8)   | Fosfomycin (2 x 1 g)+ Doripenem (3<br>x 1 g)+ Cefixime (2 x 200 mg) +<br>Vancomycin (1 x 1.5 g)<br>+ Levofloxacin (1 x 750 mg) | 1 (0.3)  |
| 17 | Isoprinosine (3 x 500 mg) +<br>Remdesivir (1 x 200 mg)<br>+ Favipiravir (day 1: 2 x1600 mg;<br>days 2-4: 2 x 600 mg) +<br>Invermectin (1 x 24 mg) | 2 (0.5)   | Azithromycin (1 x 500 mg)<br>+ Levofloxacin (1 x 750 mg) +<br>Ceftriaxone (1 x 2 g)                                            | 13 (3.4) |
| 18 | Methisoprinol (3 x 500 mg) +<br>Favipiravir (day 1: 2 x 1600 mg;<br>days 2-4: 2 x 600 mg)                                                         | 1 (0.3)   | Azithromycin (1 x 500 mg)<br>+ Ceftriaxone (1 x 2 g) + Levofloxacin<br>(1 x 750 mg) + Cefixime (2 x 200 mg)                    | 1 ((0.3) |
| 19 | Favipiravir (day 1: 2 x1600 mg;<br>days 2-4 2 x 600 mg)<br><br>+ Oseltamivir (2 x 75 mg)                                                          | 13 (3.4)  | Ceftriaxone (1 x 2 g) + Cefixime (2 x<br>200 mg)                                                                               | 1 (0.3)  |

|    |                                                                                                                                                   |          |                                                                                                                                                                                                    |          |
|----|---------------------------------------------------------------------------------------------------------------------------------------------------|----------|----------------------------------------------------------------------------------------------------------------------------------------------------------------------------------------------------|----------|
| 20 | Oseltamivir (2 x 75 mg)                                                                                                                           | 7 (1.9)  | Ceftazidime (3 x 1 g)<br>+ Cotrimoxazole (1 x 960 mg)<br>+ Amikacin (2 x 500 mg) +<br>Levofloxacin (1 x 750 mg) +<br>Azithromycin (1 x 500 mg)<br>+ Ceftriaxone (1 x 2 g) +<br>Meropenem (3 x 1 g) | 1 (0.3)  |
| 21 | Favipiravir (day 1: 2 x 1600 mg;<br>days 2-4 : 2 x 600 mg) +<br>Oseltamivir (2 x 75 mg)<br>+ Isoprinosine (3 x 500 mg)                            | 8 (2.1)  | Azithromycin (1 x 500 mg)<br>+ Cefotaxime (3 x 1 g)                                                                                                                                                | 3 (0.8)  |
| 22 | Favipiravir (day 1: 2 x 1600 mg;<br>days 2-4 2 x 600 mg) +<br>Oseltamivir (2 x 75 mg)<br>+ Isoprinosine (3 x 500 mg) +<br>Remdesivir (1 x 200 mg) | 32 (8.5) | Azithromycin (1 x 500 mg)<br>+ Levofloxacin (1 x 750 mg)                                                                                                                                           | 27 (7.1) |
| 23 | Oseltamivir (2 x 75 mg) +<br>Isoprinosine (3 x 500 mg)                                                                                            | 9 (2.4)  | Cefotaxime (3 x 1 g)                                                                                                                                                                               | 2 (0.5)  |
| 24 | Oseltamivir (2 x 75 mg) +<br>Remdesivir (1 x 200 mg)                                                                                              | 1 (0.3)  | Levofloxacin (1 x 750 mg) +<br>Ceftriaxone + Azithromycin (1 x 500<br>mg)<br>+ Meropenem (3 x 1 g)                                                                                                 | 4 (1.1)  |
| 25 | Total                                                                                                                                             | 378      | Levofloxacin (1 x 750 mg) +<br>Ceftazidime (3 x 1 g) + Cefotaxime (3<br>x 1 g)                                                                                                                     | 1 (0.3)  |
| 26 |                                                                                                                                                   |          | Clindamycin (3 x 300 mg)+<br>Levofloxacin (1 x 750 mg)                                                                                                                                             | 1 (0.3)  |
| 27 |                                                                                                                                                   |          | Cefotaxime (3 x 1 g)+ Cefixime (2 x<br>200 mg)                                                                                                                                                     | 1 (0.3)  |
| 28 |                                                                                                                                                   |          | No Antibiotic                                                                                                                                                                                      | 29 (7.7) |
| 29 |                                                                                                                                                   |          | Azithromycin (1 x 500 mg)<br>+ Cefoperazone (2 x 2 g)                                                                                                                                              | 8 (2.1)  |

|    |  |  |                                                                                                                 |          |
|----|--|--|-----------------------------------------------------------------------------------------------------------------|----------|
| 30 |  |  | Azithromycin (1 x 500 mg)<br>+ Cefoperazone (2 x 2 g)+<br>Ceftazidime                                           | 2 (0.5)  |
| 31 |  |  | Azithromycin (1 x 500 mg)<br>+ Cefoperazone (2 x 2 g) +<br>Ceftriaxone (1 x 2 g) + Meropenem (3<br>x 1 g)       | 2 (0.5)  |
| 32 |  |  | Azithromycin (1 x 500 mg)<br>+ Cefoperazone (2 x 2 g)+<br>Meropenem (3 x 1 g)                                   | 6 (1.5)  |
| 33 |  |  | Azithromycin (1 x 500 mg)<br>+ Cefoperazone (2 x 2 g) +<br>Meropenem (3 x 1 g)<br>+ Ceftazidime (3 x 1 g)       | 2 (0.5)  |
| 34 |  |  | Azithromycin (1 x 500 mg)<br>+ Levofloxacin (1 x 750 mg)+<br>Cefoperazone (2 x 2 g)                             | 4 (1.1)  |
| 35 |  |  | Azithromycin (1 x 500 mg)<br>+ Levofloxacin (1 x 750 mg) +<br>Cefoperazone (2 x 2 g) + Cefotaxime<br>(3 x 1 g)  | 1 (0.3)  |
| 36 |  |  | Azithromycin (1 x 500 mg)<br>+ Levofloxacin (1 x 750 mg) +<br>Cefoperazone (2 x 2 g) + Ceftriaxone<br>(1 x 2 g) | 6 (1.6)  |
| 37 |  |  | Azithromycin (1 x 500 mg)<br>+ Levofloxacin (1 x 750 mg)+<br>Cefoperazone (2 x 2 g) + Meropenem<br>(3 x 1 g)    | 32 (8.5) |
| 38 |  |  | Meropenem (3 x 1 g) + Ceftazidime<br>(3 x 1 g)                                                                  | 1 (0.3)  |

|    |  |  |                                                                                                                                            |         |
|----|--|--|--------------------------------------------------------------------------------------------------------------------------------------------|---------|
| 39 |  |  | Azithromycine (1 x 500 mg)<br>+ Levofloxacin (1 x 750 mg)+<br>Ceftazidime (3 x 1 g)                                                        | 1 (0.3) |
| 40 |  |  | Azithromycine (1 x 500 mg)<br>+ Levofloxacin (1 x 750 mg) +<br>Cefoperazone (2 x 2 g) + Meropenem<br>(3 x 1 g)<br>+ Ceftazidime (3 x 1 g)  | 1 (0.3) |
| 41 |  |  | Azithromycine (1 x 500 mg)<br>+ Levofloxacin (1 x 750 mg)+<br>Cefoperazone (2 x 2 g) + Meropenem<br>(3 x 1 g) + Ciprofloxacin (2 x 500 mg) | 1 (0.3) |
| 42 |  |  | Levofloxacin (1 x 750 mg)+<br>Cefixime (2 x 200 mg) + Cefotaxime<br>(3 x 1 g)                                                              | 1 (0.3) |
| 43 |  |  | Levofloxacin (1 x 750 mg) +<br>Cefoperazone (2 x 2 g) + Ceftriaxone<br>(1 x 2 g)                                                           | 1 (0.3) |
| 44 |  |  | Levofloxacin (1 x 750 mg) +<br>Cefotaxime (3 x 1 g)                                                                                        | 1 (0.3) |
| 45 |  |  | Levofloxacin (1 x 750 mg) +<br>Ceftazidime (3 x 1 g)                                                                                       | 1 (0.3) |
| 46 |  |  | Levofloxacin (1 x 750 mg) +<br>Ceftriaxone (1 x 2 g) + Ceftazidime (3<br>x 1 g)                                                            | 1 (0.3) |
| 47 |  |  | Levofloxacin (1 x 750 mg) +<br>Meropenem (3 x 1 g)<br>+ Ceftazidime (3 x 1 g)                                                              | 1 (0.3) |
| 48 |  |  | Levofloxacin (1 x 750 mg) +<br>Meropenem (3 x 1 g)<br>+ Ciprofloxacin (2 x 500 mg)                                                         | 1 (0.3) |
| 49 |  |  | Total                                                                                                                                      | 378     |
